# Supplementary material
Source: Springer Nature journal article supplement (https://www.springermedizin.de/resource/supplementary/13587_2014_59_MOESM3_ESM.pdf/9677238)

## Cue types

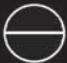

+ \$0.20

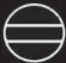

+ \$1.00

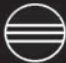

+ \$5.00

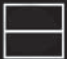

- \$0.20

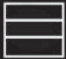

- \$1.00

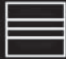

- \$5.00

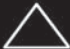

\$0.00  
(neutral)

## Fixation

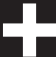

## Target

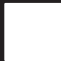

## Feedback

+ \$1.00

\$42.00

Supplement: MOESM3 [file 9677238]
